# Supplementary material for: Circulating exosomal microRNA-203 is associated with metastasis possibly via inducing tumor-associated macrophages in colorectal cancer
Source: PubMed Central journal article supplement (PMC5667985; doi:10.18632/oncotarget.20009), 2017-08-07
Supplement: oncotarget-08-78598-s001.pdf [file oncotarget-08-78598-s001.pdf]

# Circulating exosomal microRNA-203 is associated with metastasis possibly via inducing tumor-associated macrophages in colorectal cancer

## SUPPLEMENTARY MATERIALS

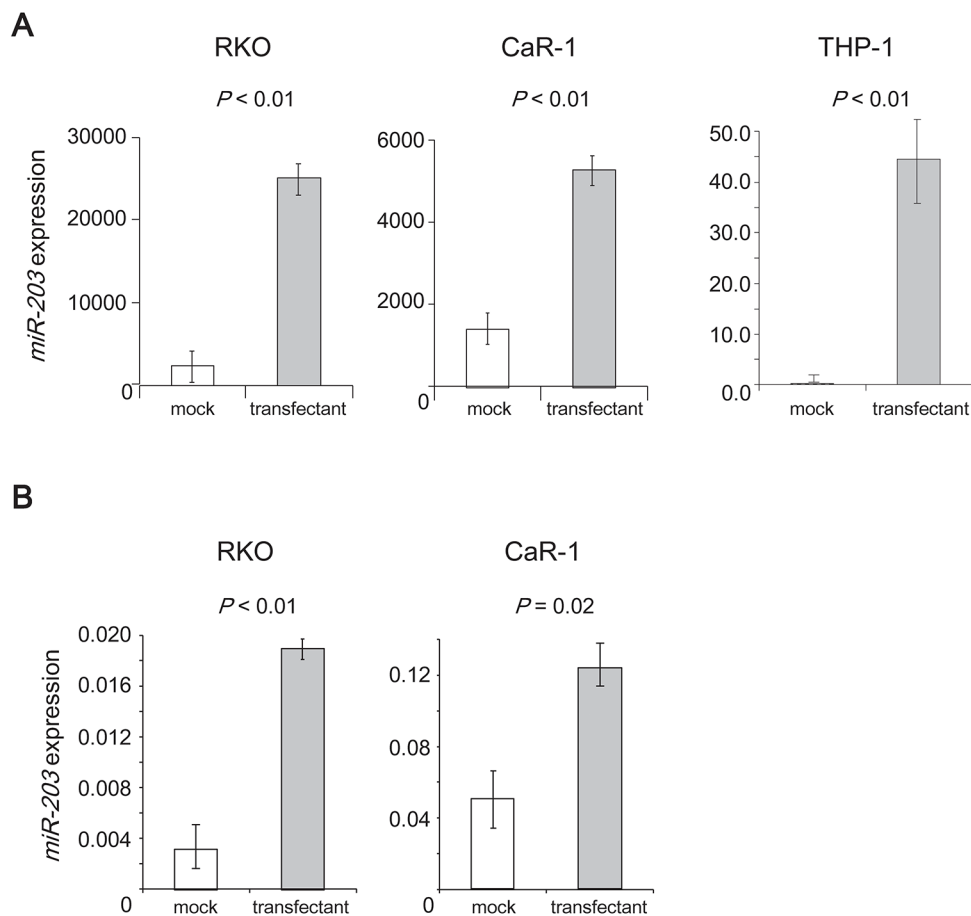

**Supplementary Figure 1: Pre-*miR-203*-transfected CRC cell lines and THP-1.** (A) *miR-203* expression in the culture medium of pre-*miR-203*-transfected RKO and CaR-1 by RT- qPCR. (B) Confirmation of *miR-203* upregulation in pre-*miR-203*-transfected RKO and CaR-1, and THP-1 by RT-qPCR.

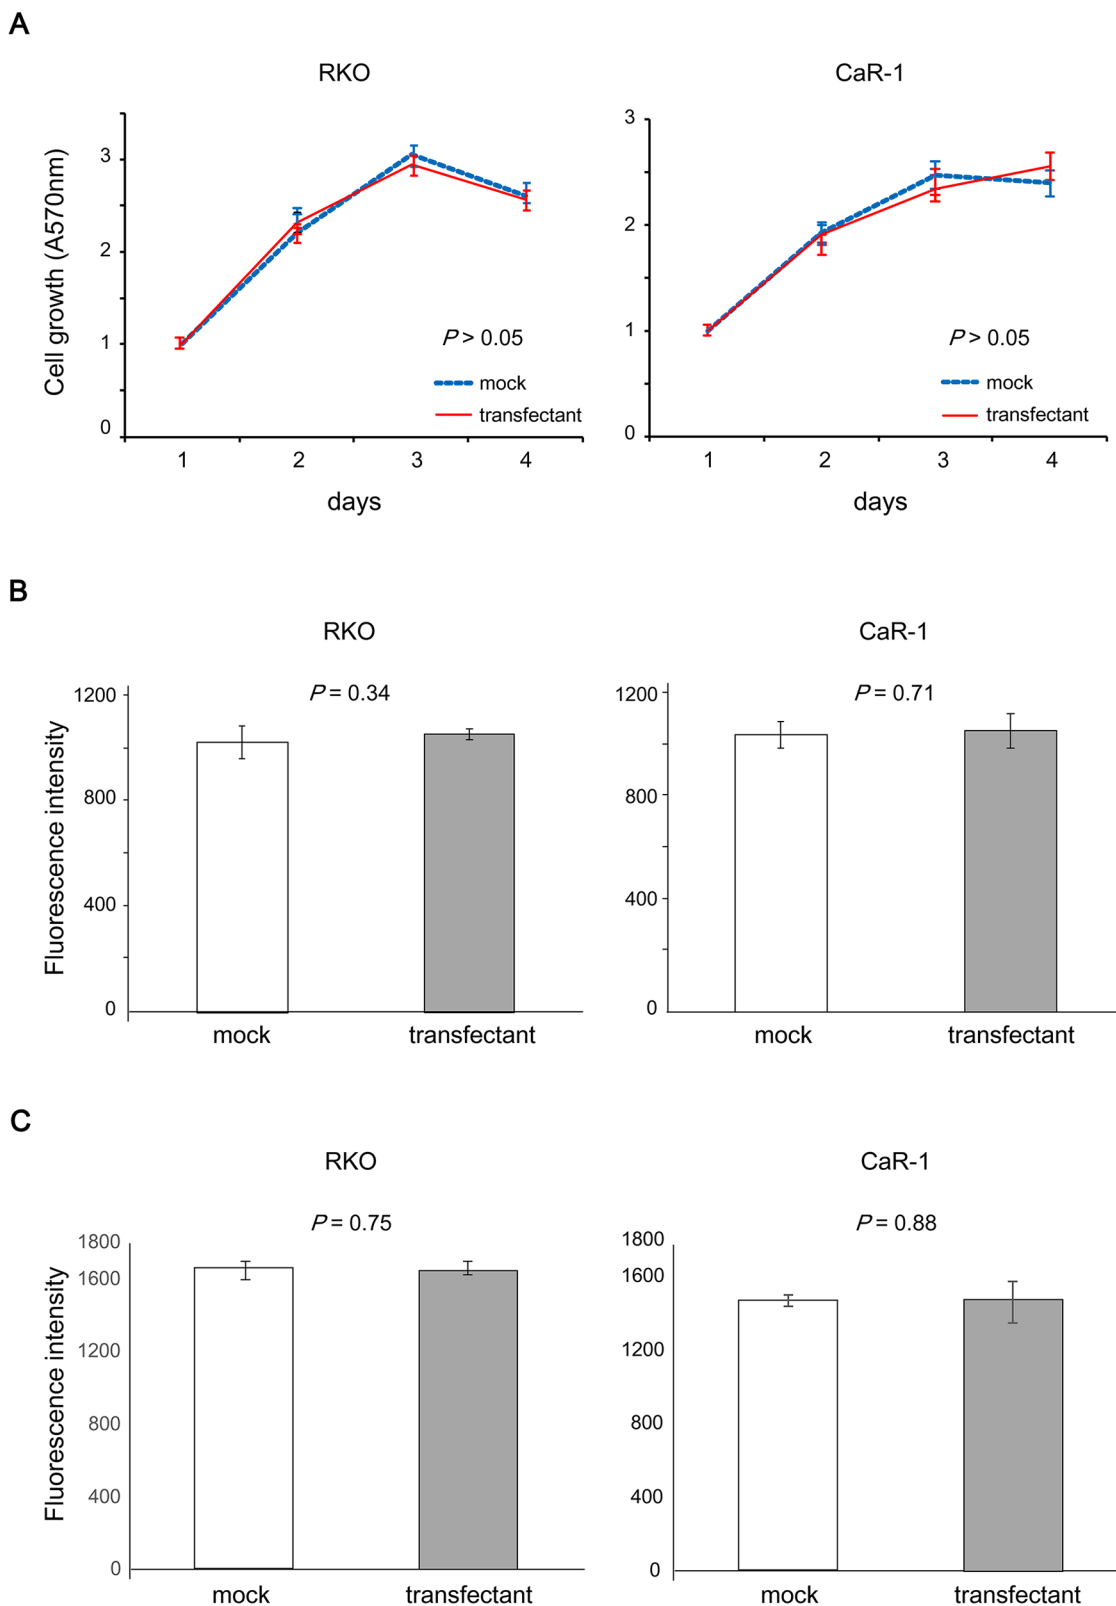

**Supplementary Figure 2: Overexpression of miR-203 did not affect proliferation, invasive or migration capacity of CRC cell lines *in vitro*.** (A) MTT assay. (B) *In vitro* invasion assay, transfectant: miR-203-transfected CRC cells; mock: the control CRC cells. (C) *In vitro* migration assay, transfectant: miR-203-transfected CRC cells; mock: the control CRC cells.

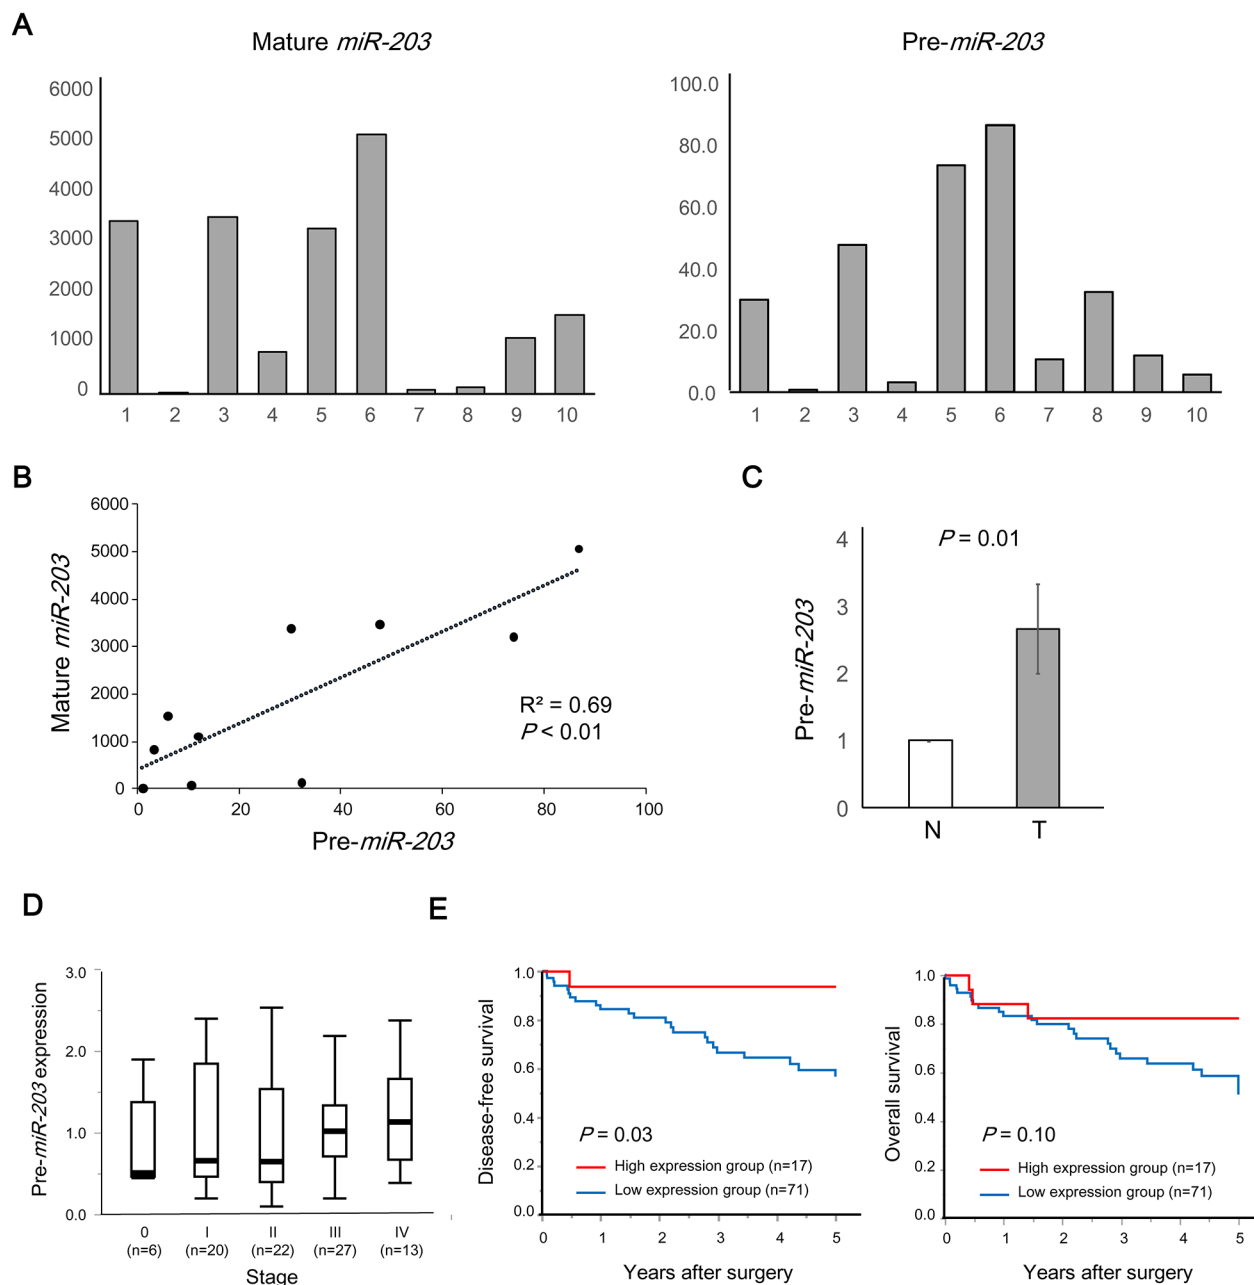

**Supplementary Figure 3: Pre-*miR-203* expression in various CRC cell lines and clinical significance of the expression in CRC tissues.** (A) Quantification of mature or pre-*miR-203* expression in various CRC cell lines by RT-qPCR. 1: Colo205; 2: Colo320DM; 3: DLD-1; 4: HCT116; 5: Lovo; 6: SW480; 7: SW620; 8: HT29; 9: RKO; 10: CaR-1. (B) Correlation between mature and pre-*miR-203* expression in CRC cell lines. (C) Quantification of pre-*miR-203* expression in CRC tissues by RT-qPCR. T: tumor tissue; N: normal colorectal tissue. (D) Pre-*miR-203* expression in different TNM stages of CRC from Kyushu datasets. There was no statistical difference in pre-*miR-203* expression among TNM stages. (E) Kaplan-Meier OS curves of 88CRC patients based on the pre-*miR-203* expression in Kyushu datasets. Left: DFS; Right: OS.

**Supplementary Table 1: Univariate and multivariate analysis of prognostic factors for DFS of CRC patients in Kyushu datasets (n=88)**

| Variables                                                  | Univariate analysis          |          | Multivariate analysis |          |
|------------------------------------------------------------|------------------------------|----------|-----------------------|----------|
|                                                            | HR<br>(95% CI <sup>a</sup> ) | <i>P</i> | HR<br>(95% CI)        | <i>P</i> |
| Histology<br>(Not well/Well)                               | 1.74 (0.77-4.31)             | 0.19     |                       |          |
| Tumor size<br>(≥5cm/<5cm)                                  | 2.32 (1.02-5.45)             | 0.04     | 0.96 (0.34-2.66)      | 0.44     |
| Depth of invasion<br>(≥SS <sup>c</sup> /≤MP <sup>b</sup> ) | 20.02 (4.21-358.22)          | <0.01    | 8.65 (1.26-180.00)    | 0.03     |
| Venous invasion<br>(+/-)                                   | 4.42 (1.85-9.98)             | <0.01    | 3.92 (1.45-10.54)     | <0.01    |
| Lymphatic invasion<br>(+/-)                                | 2.70 (1.20-6.18)             | 0.02     | 0.94 (0.35-2.50)      | 0.90     |
| Lymph node metastasis<br>(+/-)                             | 4.63 (1.99-11.98)            | <0.01    | 1.20 (0.36-3.97)      | 0.76     |
| Liver matastasis<br>(+/-)                                  | 10.15 (4.18-23.28)           | <0.01    | 4.51 (1.44-14.08)     | 0.01     |
| Peritoneal dissemination<br>(+/-)                          | 39.11 (9.06-200.92)          | <0.01    | 16.35 (2.93-108.60)   | <0.01    |
| Pre- <i>miR-203</i> in tumor tissue<br>(high/low)          | 0.14 (0.01-0.68)             | <0.01    | 0.17 (0.01-0.89)      | 0.03     |

<sup>a</sup>CI, confidence interval; <sup>b</sup>MP, muscularis propria; <sup>c</sup>SS, subserosa.

**Supplementary Table 2: Relationship between clinicopathological factors and pre-*miR-203* expression in CRC tissues in Kyushu datasets (n=88)** <sup>a</sup>NA, not available; <sup>b</sup>MP, muscularis propria; <sup>c</sup>SS, subserosa.

See Supplementary File 1

**Supplementary Table 3: Patient characteristics**

| No | Age | Sex | Location        | Size of primary tumor (cm) | T  | N | H | P | M | Tissue-type | ly | v | Stage |
|----|-----|-----|-----------------|----------------------------|----|---|---|---|---|-------------|----|---|-------|
| 1  | 48  | F   | RS <sup>a</sup> | 2.8×2.0                    | 3  | 0 | 0 | 0 | 0 | Well        | 1  | 0 | II    |
| 2  | 54  | F   | R <sup>b</sup>  | 3.0×2.8                    | 2  | 0 | 0 | 0 | 0 | Mod         | 1  | 0 | I     |
| 3  | 70  | M   | S <sup>c</sup>  | 1.5×1.3                    | 2  | 1 | 0 | 0 | 0 | Well        | 1  | 0 | IIIa  |
| 4  | 39  | F   | R-RS            | 9.0×8.5                    | 4b | 0 | 0 | 0 | 0 | Por         | 1  | 0 | II    |
| 5  | 62  | M   | R               | 7.6×4.8                    | 3  | 0 | 0 | 0 | 0 | Mod         | 1  | 1 | II    |
| 6  | 39  | F   | S               | 4.5×4.0                    | 3  | 0 | 0 | 0 | 0 | Well        | 2  | 2 | II    |
| 7  | 62  | F   | S<br>Liver      | 4.2×3.2                    | 4a | 3 | 1 | 0 | 1 | Mod         | 1  | 1 | IV    |
| 8  | 59  | M   | R<br>Liver      | 7.0×6.0                    | 3  | 2 | 1 | 0 | 1 | mod         | 1  | 2 | IV    |
| 9  | 78  | M   | RS<br>Liver     | 6.0×2.5                    | 3  | 2 | 1 | 0 | 1 | mod         | 2  | 1 | IV    |
| 10 | 69  | F   | S<br>Liver      | 4.8×3.1                    | 3  | 1 | 2 | 0 | 1 | mod         | 1  | 0 | IV    |

<sup>a</sup>RS, rectosigmoid; <sup>b</sup>R, rectum; <sup>c</sup>S, sigmoid.
